# Supplementary material for: Temperature and environmentally stable titanium carbide as an electron-selective heterocontact for crystalline silicon solar cells
Source: Royal Society of Chemistry journal article supplement (doi:10.1039/d3tc01388j), 2023-01-01
Supplement: d3tc01388j1.pdf [file d3tc01388j1.pdf]

## Supporting Information

### Temperature and Environmental Stable Titanium Carbide as Electron-Selective Heterocontact for Crystalline Silicon Solar Cells

*Yang Ding, Zhiping Huang, Deyuan Wei\*, Jingwei Chen, Biao Sun, Chong Di, Jianming Wang, Kangping Zhang, Ying Xu\*, Guangsheng Fu\**

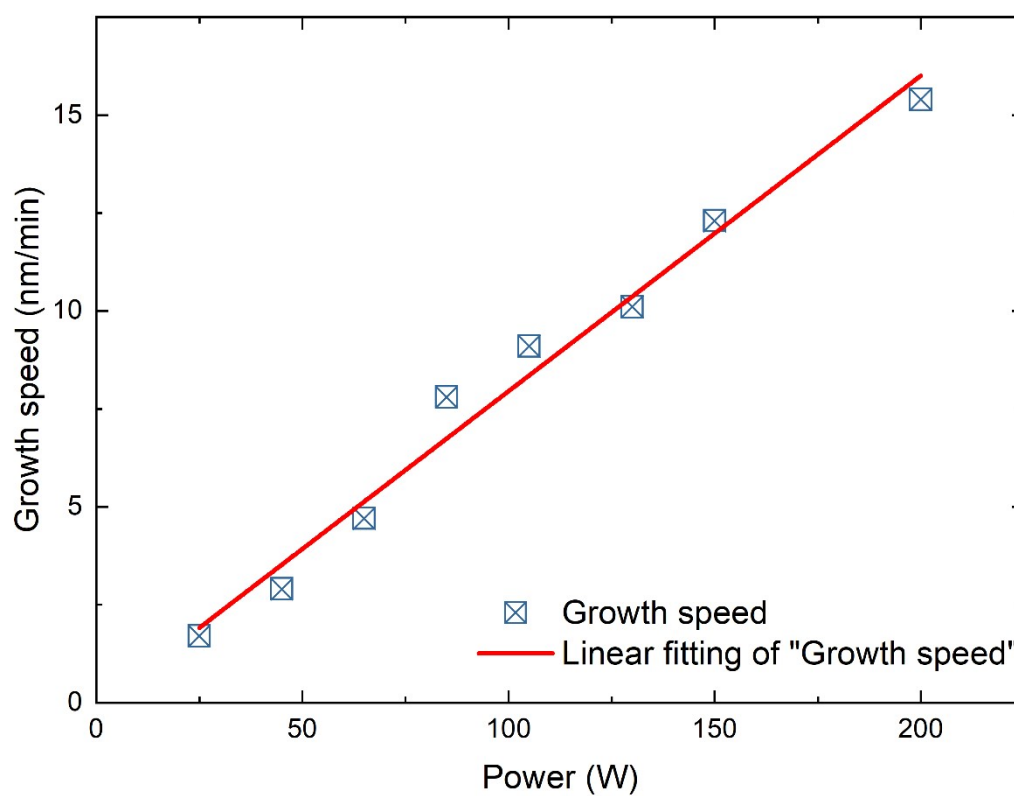

**Figure S1.** Growth speed of 200 W 2.0 Pa RF-sputtered  $\text{TiC}_x$  film.

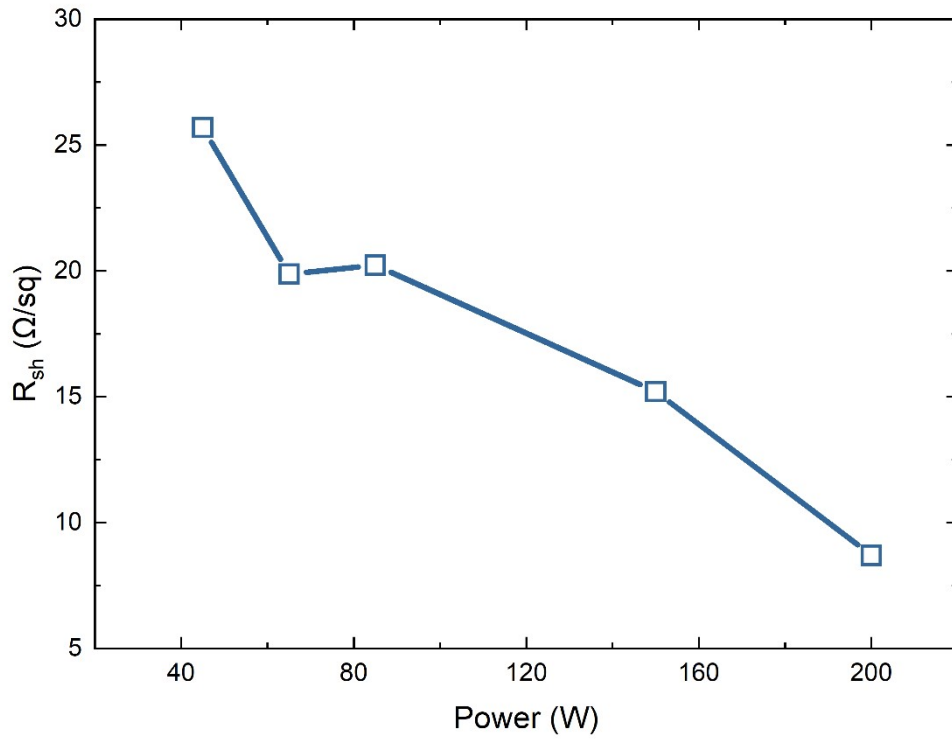

**Figure S2.** Square resistance of 300 nm  $TiC_x$  films at different sputtering powers with working pressure of 2.0 Pa.

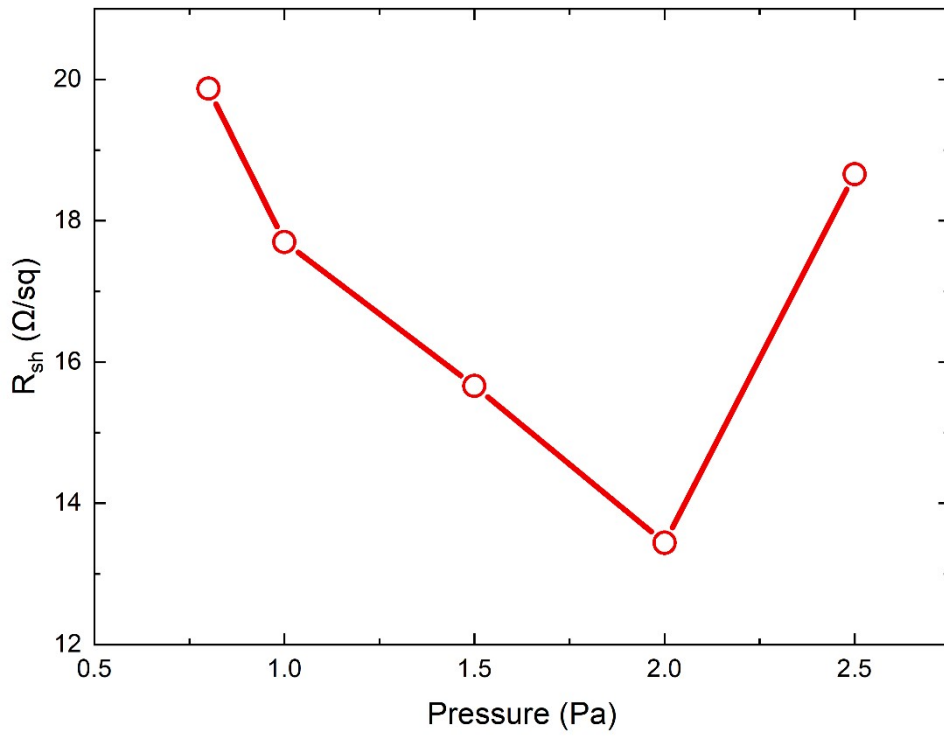

**Figure S3.** Square resistance of 300 nm  $TiC_x$  films at different working pressures with sputtering power of 200 W.

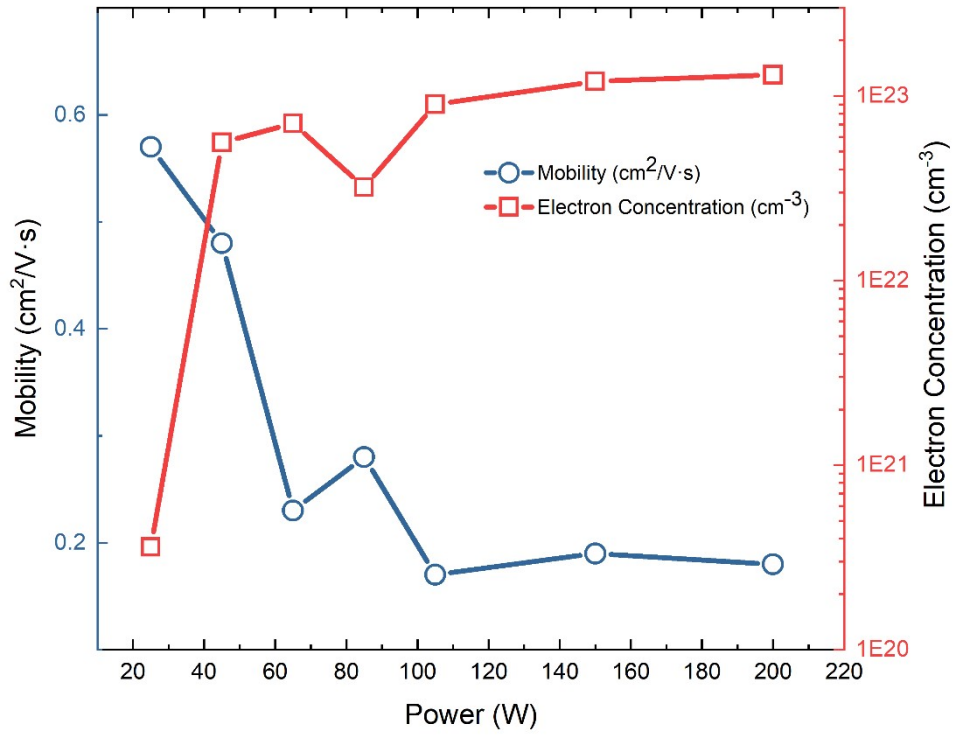

**Figure S4.** Electron concentration and mobility at different sputtering powers.

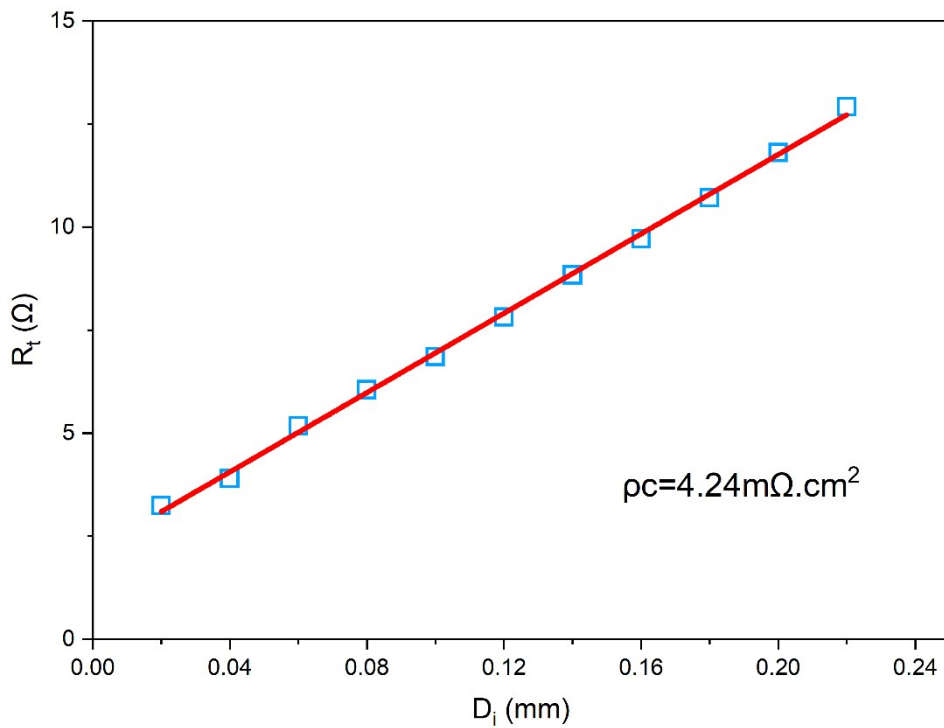

**Figure S5.** Linear fit to  $R_t$  to calculate contact resistivity.

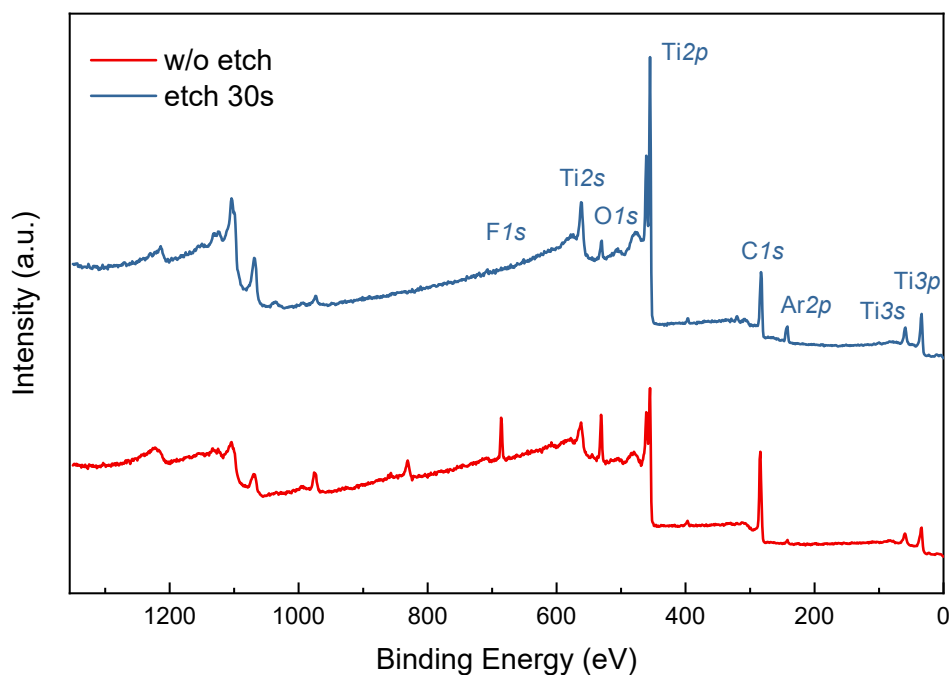

**Figure S6.** XPS survey of 200 W 2.0 Pa sputtered  $\text{TiC}_x$  film before and after surface etching.

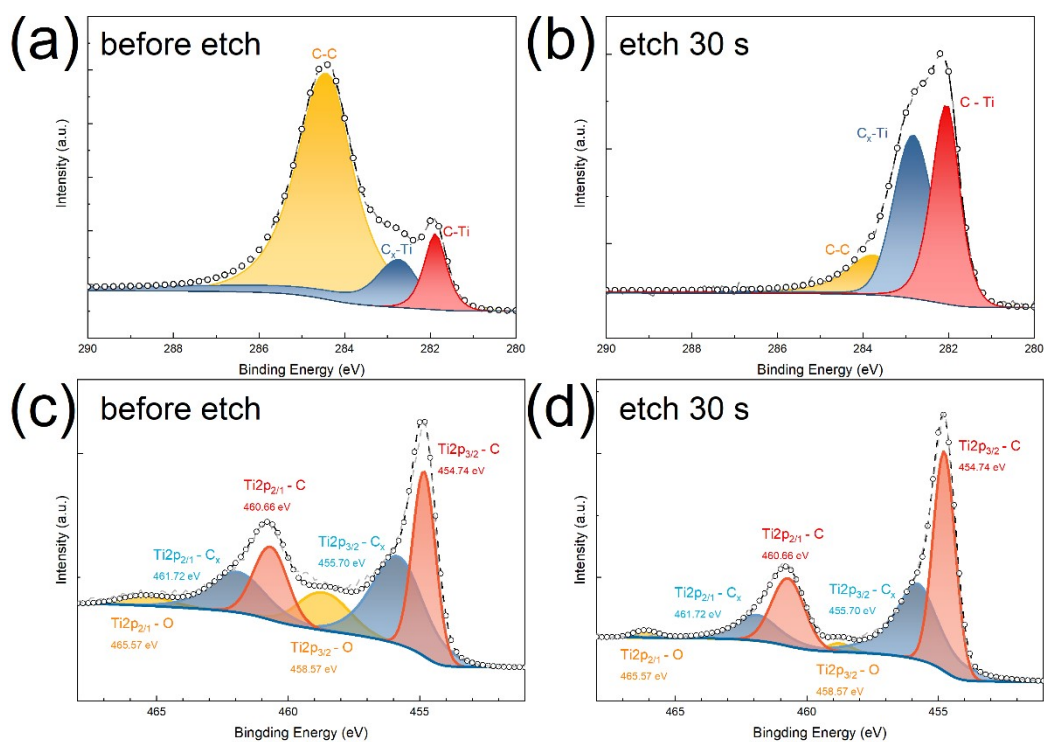

**Figure S7.** **a)** and **b)** XPS core-level spectra of  $\text{C}1s$  for the  $\text{TiC}_x$  films before and after surface etching, **c)** and **d)** XPS core-level spectra of  $\text{Ti}2p$  for the  $\text{TiC}_x$  films before and after surface etching.

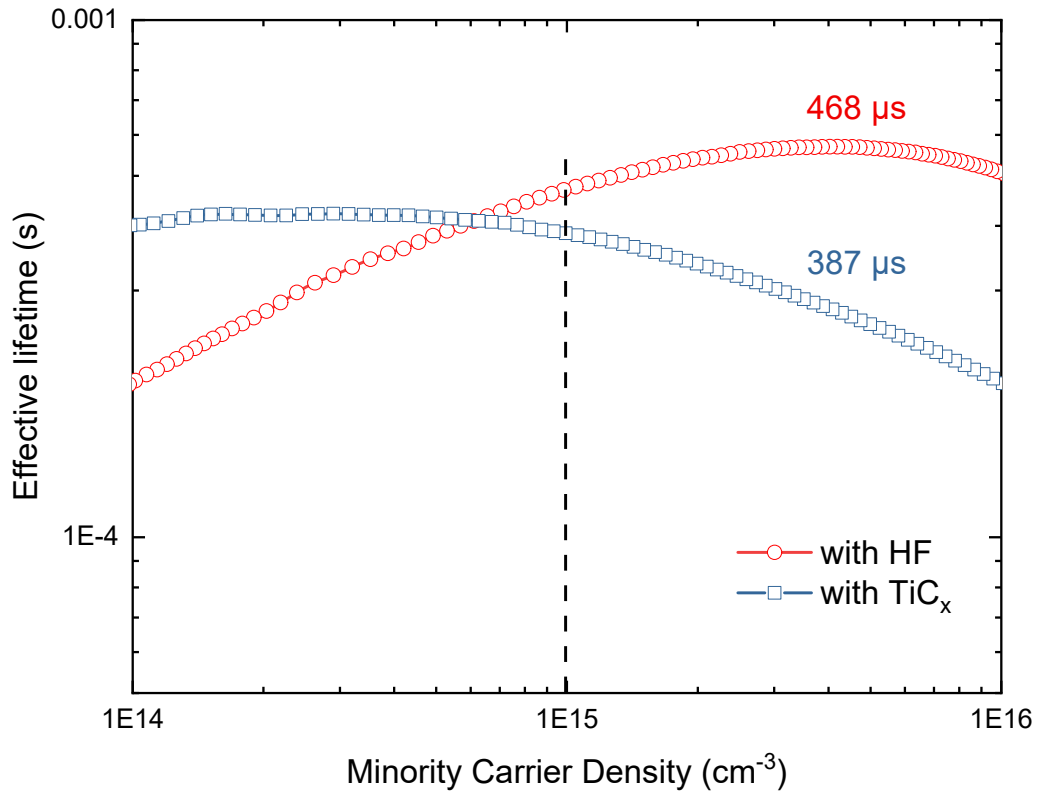

**Figure S8.** The effective minority carrier lifetimes of n-Si substrate (FZ, 3  $\Omega\text{cm}$ ) passivated by 5 nm  $\text{TiC}_x$  thin film or HF treatment.

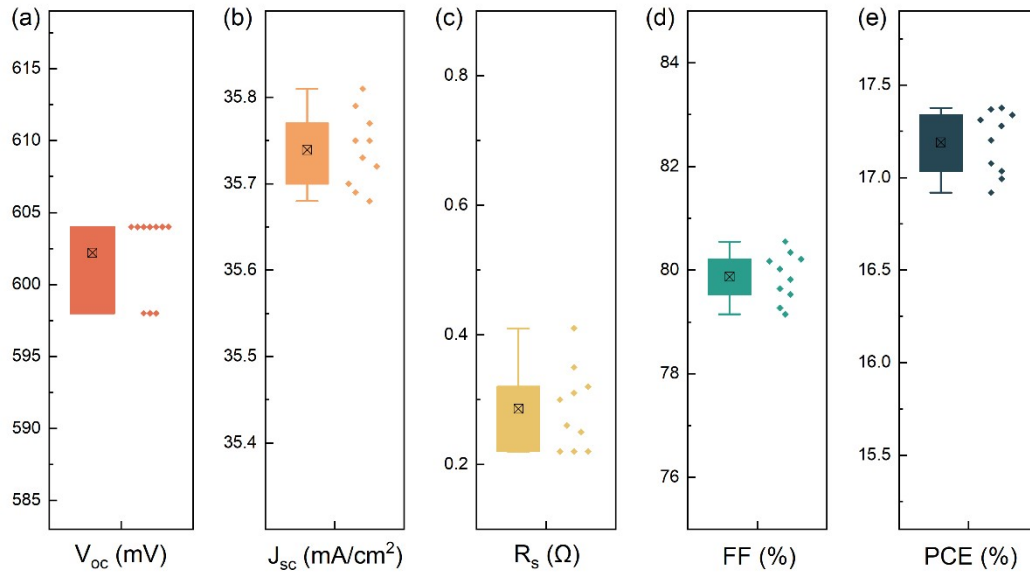

**Figure S9.** Reproducibility of the device with  $\text{TiC}_x$  ETL.

**Table S1.** Thermal stability Key parameters of representative silicon solar cells, device configurations and best power conversion efficiencies (PCE).

| Materials                 | Contact structure                                  | Thickness | Withstand temperature (°C) | PCE (%) | Reference |
|---------------------------|----------------------------------------------------|-----------|----------------------------|---------|-----------|
| TiO <sub>x</sub>          | n-Si/ SiO <sub>2</sub> / TiO <sub>x</sub> / Al/ Ag | 3.5       | 300                        | 20.5    | [1]       |
| TiO <sub>x</sub> /LiF/Al  | n-Si/ a-Si:H(i)/ TiO <sub>x</sub> / LiF/ Al        | 1.5       | 300 <sup>b)</sup>          | 20.7    | [2]       |
| TiO <sub>x</sub> /LiF/Yb  | n-Si/ a-Si:H(i)/ TiO <sub>x</sub> / LiF/ Yb/ Ag    | 1.0       | 175 <sup>b)</sup>          | 19.2    | [3]       |
| MgO <sub>x</sub>          | n-Si/ MgO <sub>x</sub> / Al                        | 1.0       | 400                        | 20.0    | [4]       |
| Sc                        | n-Si/ SiO <sub>2</sub> / Sc/ Al                    | 14.0      | 700                        | 14.2    | [5]       |
| TiO <sub>x</sub>          | n-Si/ SiO <sub>2</sub> / TiO <sub>x</sub> / Al     | 4.5       | 300                        | 21.6    | [6]       |
| TiO <sub>x</sub>          | n-Si/ TiO <sub>x</sub> / Al <sup>d)</sup>          | 1.5       | 400                        | 23.1    | [7]       |
| TiO <sub>x</sub> /Yb      | n-Si/ a-Si:H(i)/ TiO <sub>x</sub> / Yb/ Ag         | 1.0       | 300 <sup>b)</sup>          | 17.6    | [8]       |
| YbSi <sub>x</sub>         | n-Si/ a-Si:H(i)/ YbSi <sub>x</sub> / Ag            | 2.1       | 300 <sup>b)</sup>          | 17.0    | [9]       |
| AMC or AEMC <sup>a)</sup> | n-Si/ AMC or AEMC/ Al                              | 1.0       | 350 <sup>b)</sup>          | 19.4    | [10]      |
| MAcac <sup>c)</sup>       | n-Si/ a-Si:H(i)/ MAcac/ Al                         | 1.0       | 350 <sup>b)</sup>          | 21.6    | [11]      |

a) alkali metal carbonate (AMC), alkali earth metal carbonate (AEMC)

b) Passed 100 H 85°C 85% Humidity damp heat test

c) metal acetylacetonate (MAcac)

d) SiN<sub>x</sub> passivated Partial Rear Contact

**Table S2.** Principal input parameters of back contact TiC<sub>x</sub> electron transport solar cell

|                                      | p <sup>+</sup>                       | n                    | TiC <sub>x</sub> ETL |
|--------------------------------------|--------------------------------------|----------------------|----------------------|
| Thickness (μm)                       | 0.40                                 | 180                  | 0.004                |
| E <sub>g</sub> (eV)                  | 1.12                                 | 1.12                 | 2.8                  |
| N <sub>D</sub> (cm <sup>-3</sup> )   | 0                                    | 1.6 e <sup>15</sup>  | 1 e <sup>19</sup>    |
| N <sub>A</sub> (cm <sup>-3</sup> )   | Gauss diffusion<br>1 e <sup>20</sup> | 0                    | 0                    |
| χ (eV)                               | 4.05                                 | 4.05                 | 4.04                 |
| μ <sub>n</sub> (cm <sup>2</sup> /Vs) | 1450                                 | 1450                 | 0.5                  |
| μ <sub>p</sub> (cm <sup>2</sup> /Vs) | 450                                  | 450                  | 0.2                  |
| N <sub>C</sub> (cm <sup>-3</sup> )   | 2.8 e <sup>19</sup>                  | 2.8 e <sup>19</sup>  | 2.8 e <sup>19</sup>  |
| N <sub>V</sub> (cm <sup>-3</sup> )   | 1.04 e <sup>19</sup>                 | 1.04 e <sup>19</sup> | 1.04 e <sup>19</sup> |

**Table S3.** Cell performance at 1000H damp heat test.

| 85°C 85% Humidity test time (H) | V <sub>oc</sub> (mV) | J <sub>sc</sub> (mA/cm <sup>2</sup> ) | FF (%) | PCE (%) |
|---------------------------------|----------------------|---------------------------------------|--------|---------|
| 40                              | 604                  | 35.75                                 | 80.02  | 17.28   |
| 100                             | 600                  | 35.53                                 | 81.09  | 17.31   |
| 200                             | 604                  | 35.34                                 | 80.82  | 17.25   |
| 300                             | 600                  | 35.57                                 | 80.98  | 17.31   |
| 500                             | 604                  | 35.53                                 | 81.18  | 17.42   |
| 700                             | 598                  | 35.41                                 | 80.49  | 17.07   |
| 800                             | 600                  | 34.83                                 | 80.44  | 16.83   |
| 900                             | 600                  | 34.80                                 | 79.65  | 16.65   |
| 1000                            | 598                  | 34.76                                 | 78.23  | 16.29   |

## References

- [1] X. Yang, P. Zheng, Q. Bi and K. Weber, *Solar Energy Materials and Solar Cells*, 2016, **150**, 32-38.
- [2] J. Bullock, Y. Wan, Z. Xu, S. Essig, M. Hettick, H. Wang, W. Ji, M. Boccard, A. Cuevas, C. Ballif and A. Javey, *ACS Energy Letters*, 2018, **3**, 508-513.
- [3] J. Cho, J. Melskens, M. R. Payo, M. Debucquoy, H. S. Radhakrishnan, I. Gordon, J. Szlufcik, W. M. M. Kessels and J. Poortmans, *ACS Applied Energy Materials*, 2019, **2**, 1393-1404.
- [4] Y. Wan, C. Samundsett, J. Bullock, M. Hettick, T. Allen, D. Yan, J. Peng, Y. Wu, J. Cui, A. Javey and A. Cuevas, *Advanced Energy Materials*, 2016, **7**.
- [5] C. Quan, H. Tong, Z. H. Yang, X. X. Ke, M. D. Liao, P. Q. Gao, D. Wang, Z. Z. Yuan, K. M. Chen, J. Yang, X. Y. Zhang, C. H. Shou, B. J. Yan, Y. H. Zeng and J. C. Ye, *Solar Rrl*, 2018, **2**.
- [6] X. Yang, Q. Bi, H. Ali, K. Davis, W. V. Schoenfeld and K. Weber, *Adv Mater*, 2016, **28**, 5891-5897.
- [7] J. Bullock, Y. Wan, M. Hettick, X. Zhaoran, S. P. Phang, D. Yan, H. Wang, W. Ji, C. Samundsett, Z. Hameiri, D. Macdonald, A. Cuevas and A. Javey, *Advanced Energy Materials*, 2019, **9**.
- [8] J. Cho, H. Sivaramakrishnan Radhakrishnan, R. Sharma, M. Recaman Payo, M. Debucquoy, A. van der Heide, I. Gordon, J. Szlufcik and J. Poortmans, *Solar Energy Materials and Solar Cells*, 2020, **206**.
- [9] J. Cho, H. Sivaramakrishnan Radhakrishnan, M. Recaman Payo, M. Debucquoy, A. van der Heide, I. Gordon, J. Szlufcik and J. Poortmans, *ACS Applied Energy Materials*, 2020, **3**, 3826-3834.
- [10] Y. M. Wan, J. Bullock, M. Hettick, Z. R. Xu, C. Samundsett, D. Yan, J. Peng, J. C. Ye, A. Javey and A. Cuevas, *Advanced Energy Materials*, 2018, **8**.
- [11] J. He, W. J. Wang, L. Cai, H. Lin, Z. L. Wang, S. K. Karuturi and P. Q. Gao, *Advanced Functional Materials*, 2020, **30**.
